# Supplementary material for: Differential Dynamics of the Maternal Immune System in Healthy Pregnancy and Preeclampsia
Source: PubMed Central journal article supplement (PMC6584811; doi:10.3389/fimmu.2019.01305), 2019-06-11
Supplement: Data_Sheet_1.pdf [file Data_Sheet_1.pdf]

## Supplementary Material

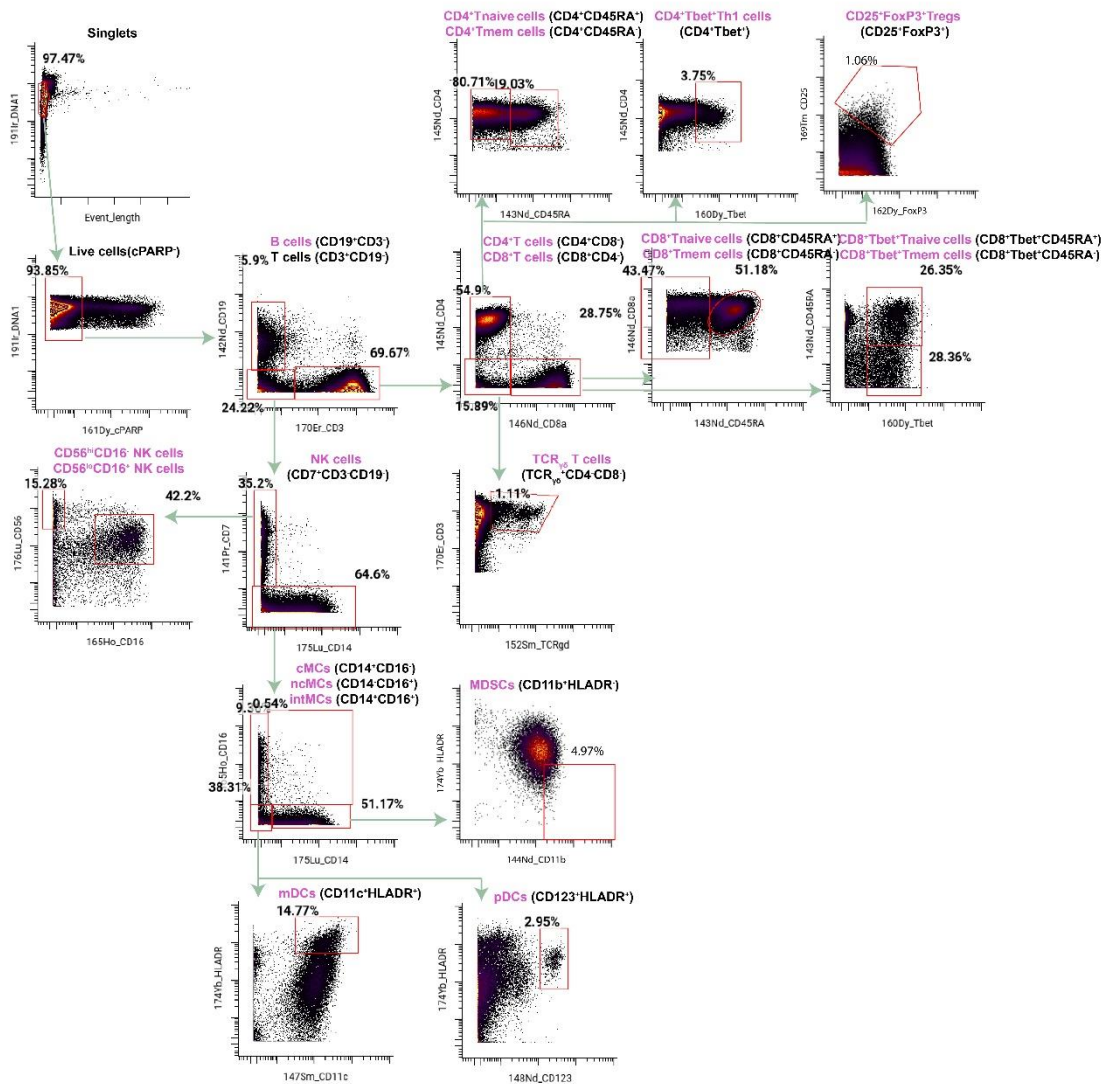

**Figure S1. Gating strategy.** Twenty-one immune cell subsets were gated based on established guidelines for manual gating of innate and adaptive cells (57).

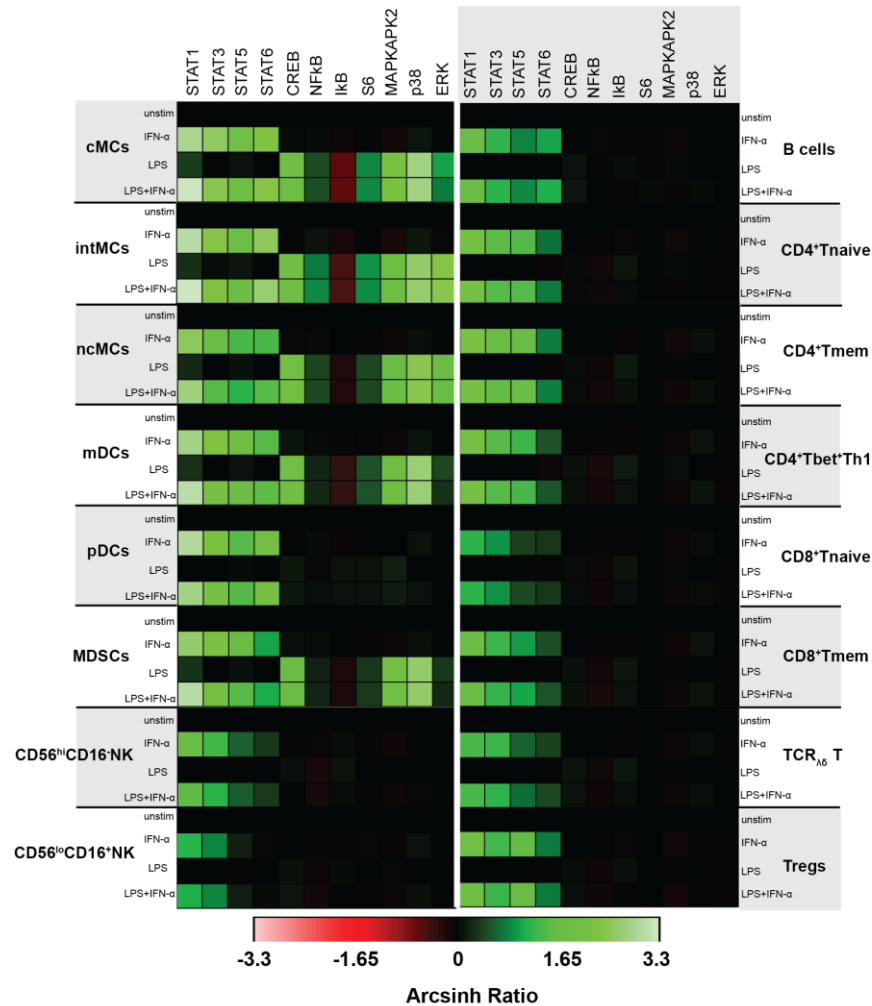

**Figure S2. Optimization of the stimulation condition.** PBMC sample availability allowed for only one stimulation to be performed. LPS and IFN- $\alpha$  were utilized in combination to maximize the functional information obtained from the stimulated samples. Blood samples from a healthy volunteer was left unstimulated (*first row*) or stimulated with LPS alone (1  $\mu\text{g}/\text{mL}$ , *second row*), IFN- $\alpha$  alone (100  $\text{ng}/\text{mL}$ , *third row*), or both (*fourth row*) for 15min and analyzed using mass cytometry. The heatmaps show that the mass cytometry immunoassay detected little overlap in immune cell signaling activities in response to LPS and IFN- $\alpha$  alone. Immune signaling responses to LPS were restricted to pERK1/2, pP38, pMAPKAPK2, pS6, pCREB, pNF- $\kappa\text{B}$  and total I $\kappa\text{B}$  in innate immune cells. Immune signaling response to IFN- $\alpha$  were restricted to pSTAT1, pSTAT3, pSTAT5, pSTAT6 in innate and adaptive immune cells).

### A. Basal pSTAT5, CD4<sup>+</sup>T cell subsets

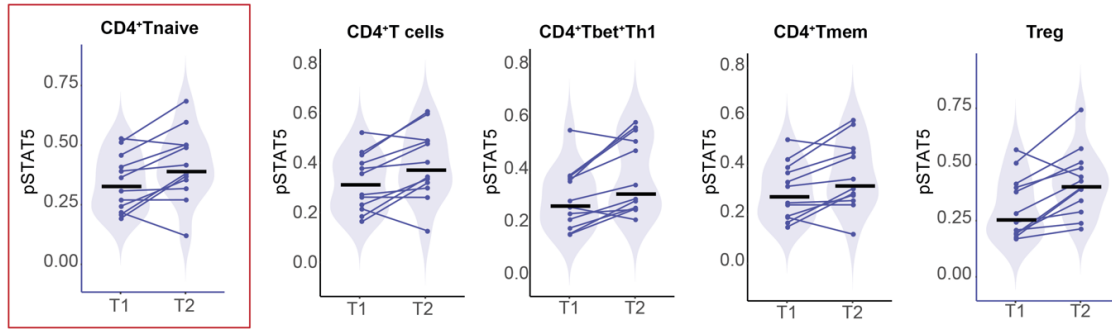

### B. pSTAT1, NK cell subsets, LPS+IFN- $\alpha$

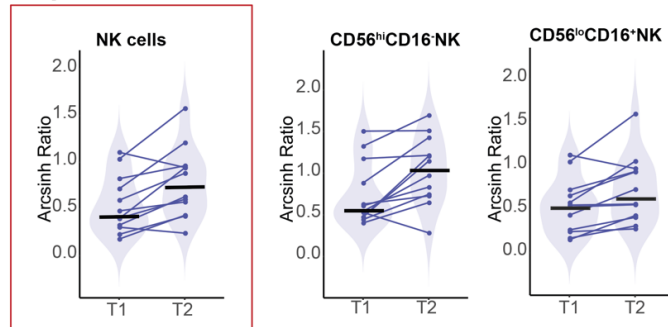

### C. Treg frequency

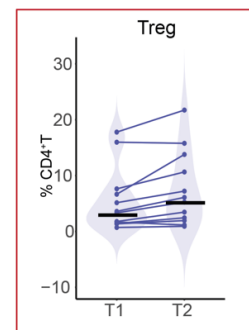

**Figure S3. The mass cytometry immunoassay detects expected immune cell adaptations during a healthy pregnancy.** Targeted analysis of select immune adaptations in the control group confirms previously reported signaling and frequency immune cell adaptations during a normal pregnancy, including (A) increased basal pSTAT5 signals in CD4<sup>+</sup>Tnaive ( $p=0.015$ ), CD4<sup>+</sup>Tmem ( $p=0.013$ ) and Treg cell subsets ( $p=0.008$ ), (B) increased pSTAT1 response to LPS+IFN- $\alpha$  in NK cell subsets ( $p=0.004$ ) and (C) increased Treg cell frequency ( $p=0.008$ ).

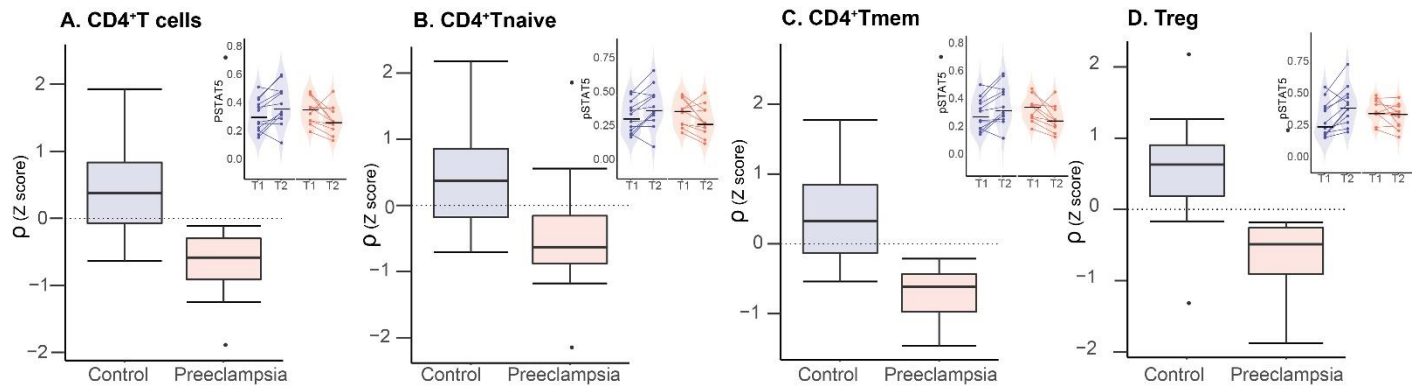

**Figure S4. pSTAT5 signal (basal) in CD4<sup>+</sup>T subsets.** Total CD4<sup>+</sup>T cells (A), CD4<sup>+</sup>Tnaive (B), CD4<sup>+</sup>Tmem (C), CD25<sup>+</sup>FoxP3<sup>+</sup>Tregs (D). Boxplots (left panel) depict immune feature rate of change ( $\rho$ ) for controls (purple) and preeclampsia (orange) study participants. Insets (right panels): Immune feature values (arcsinh transform of mass cytometry intracellular signal mean intensity) are represented for individual time points and for each patient (lines).

| Antibody               | Manufacturer   | Symbol | Mass | Clone         | Comment   |
|------------------------|----------------|--------|------|---------------|-----------|
| Barcode 1              | Trace Sciences | Pd     | 102  |               | Barcode   |
| Barcode 2              | Trace Sciences | Pd     | 104  |               | Barcode   |
| Barcode 3              | Trace Sciences | Pd     | 105  |               | Barcode   |
| Barcode 4              | Trace Sciences | Pd     | 106  |               | Barcode   |
| Barcode 5              | Trace Sciences | Pd     | 108  |               | Barcode   |
| Barcode 6              | Trace Sciences | Pd     | 110  |               | Barcode   |
| CD235ab                | Biologend      | In     | 113  | HIR2          | Phenotype |
| CD61                   | BD             | In     | 113  | VI-PL2        | Phenotype |
| CD45                   | Biologend      | In     | 115  | HI30          | Phenotype |
| CD66                   | BD             | La     | 139  | CD66a-B1.1    | Phenotype |
| CD7                    | BD             | Pr     | 141  | M-T701        | Phenotype |
| CD19                   | Biologend      | Nd     | 142  | HIB19         | Phenotype |
| CD45RA                 | Biologend      | Nd     | 143  | HI100         | Phenotype |
| CD11b                  | Fluidigm       | Nd     | 144  | ICRF44        | Phenotype |
| CD4                    | Fluidigm       | Nd     | 145  | RPA-T4        | Phenotype |
| CD8a                   | Fluidigm       | Nd     | 146  | RPA-T8        | Phenotype |
| CD11c                  | Fluidigm       | Sm     | 147  | Bu15          | Phenotype |
| CD123                  | Biologend      | Nd     | 148  | 6H6           | Phenotype |
| pCREB (pS133)          | CST            | Sm     | 149  | 87G3          | Function  |
| pSTAT5 (pY694)         | Fluidigm       | Nd     | 150  | 47            | Function  |
| pP38 (pT180/pY182)     | BD             | Eu     | 151  | 36/p38        | Function  |
| TCR $\gamma\delta$     | Fluidigm       | Sm     | 152  | 11F2          | Phenotype |
| pSTAT1 (pY701)         | Fluidigm       | Eu     | 153  | 58D6          | Function  |
| pSTAT3 (pY705)         | CST            | Sm     | 154  | M9C6          | Function  |
| pS6 (pS235/pS236)      | CST            | Gd     | 155  | D57.2.2E      | Function  |
| CD33                   | Fluidigm       | Gd     | 158  | WM53          | Phenotype |
| pMAPKAPK2 (pT334)      | Fluidigm       | Tb     | 159  | 27B7          | Function  |
| Tbet                   | Fluidigm       | Gd     | 160  | 4B10          | Phenotype |
| cPARP                  | BD             | Dy     | 161  | F21-852       | Function  |
| FoxP3                  | Fluidigm       | Dy     | 162  | PCH101        | Phenotype |
| I $\kappa$ B           | Fluidigm       | Dy     | 164  | L35A5         | Function  |
| CD16                   | Fluidigm       | Ho     | 165  | 3G8           | Phenotype |
| pNF $\kappa$ B (pS529) | Fluidigm       | Er     | 166  | K10-895.12.50 | Function  |
| pSTAT6 (pY641)         | Fluidigm       | Er     | 168  | 18            | Function  |
| CD25                   | Biologend      | Tm     | 169  | M-A251        | Phenotype |
| CD3                    | Fluidigm       | Er     | 170  | UCHT1         | Phenotype |
| pERK1/2 (pT202/pY204)  | Fluidigm       | Yb     | 171  | D13.14.4E     | Function  |
| HLA-DR                 | Fluidigm       | Yb     | 174  | L243          | Phenotype |
| CD14                   | Fluidigm       | Yb     | 175  | M5E2          | Phenotype |
| CD56                   | BD             | Yb     | 176  | NCAM16.2      | Phenotype |
| DNA1                   | Fluidigm       | Ir     | 191  |               | DNA       |
| DNA2                   | Fluidigm       | Ir     | 192  |               | DNA       |

**Table S1. Antibody panel used for mass cytometry analysis.**

| Features                                                           | Selection frequency | p-value | AUC    | Community | p-value (adjusted for clinical covariates) |
|--------------------------------------------------------------------|---------------------|---------|--------|-----------|--------------------------------------------|
| pSTAT5 (basal), CD4 <sup>+</sup> Tbet <sup>+</sup> Th1             | 0.5483              | 0.0001  | 0.9167 | 1         | 0.001                                      |
| MAPKAPK2 (basal), CD4 <sup>+</sup> Tnaive                          | 0.3879              | 0.0032  | 0.9091 | 2         | 0.014                                      |
| pSTAT5 (basal), mDCs                                               | 0.3798              | 0.0026  | 0.9167 | 2         | 0.003                                      |
| pSTAT1 (basal), cMCs                                               | 0.2379              | 0.0117  | 0.7955 | 2         | <0.001                                     |
| pNFkB (basal), cMCs                                                | 0.1916              | 0.0040  | 0.8182 | 6         | 0.005                                      |
| pP38 (basal), Tregs                                                | 0.1828              | 0.0323  | 0.8182 | 1         | 0.044                                      |
| pSTAT1 (basal), intMCs                                             | 0.1796              | 0.0004  | 0.9318 | 2         | 0.001                                      |
| pCREB (LPS+IFN- $\alpha$ ), cMCs,                                  | 0.1510              | 0.0177  | 0.7955 | 4         | 0.259                                      |
| CD8 <sup>+</sup> Tbet <sup>+</sup> CD45RA <sup>-</sup> , frequency | 0.1435              | 0.1137  | 0.6591 | N/A       | 0.755                                      |
| pP38 (basal), TCR $\gamma\delta$ T,                                | 0.1415              | 0.0002  | 0.9015 | 1         | <0.001                                     |

**Table S2. Reduced LASSO model components.** As BMI, autoimmune disease, hypertension, type 2 diabetes were significantly different between the two study groups, a multiple linear regression was performed to determine whether the presence of preeclampsia was still an independent predictor of the components of the reduced LASSO model after accounting for these potential clinical confounders. Results showed that the presence of preeclampsia was still a significant predictor for eight out of the remaining nine model components after adjusting for BMI, autoimmune disease, hypertension, and type 2 diabetes. Preeclampsia was not a significant predictor of the pCREB, cMCs, LPS+IFN- $\alpha$  model component after accounting for these confounding variables (p-value > 0.05, Mann-Whitney U test).
